# Supplementary material for: Color stability of ceramic veneers as a function of resin cement curing mode and shade: 3-year follow-up
Source: PubMed Central journal article supplement (PMC6602287; doi:10.1371/journal.pone.0219183), 2019-07-01
Supplement: pone.0219183.s001.pdf [file pone.0219183.s001.pdf]

**Color stability of ceramic veneers as a function of resin cement curing mode and shade: 3-year follow-up**

|                         |      | $\Delta E_{ab}$ 1 h | $\Delta E_{ab}$ 24 h | $\Delta E_{ab}$ 7 days | $\Delta E_{ab}$ 30 days | $\Delta E_{ab}$ 180 days | $\Delta E_{ab}$ 1 year | $\Delta E_{ab}$ 2 years | $\Delta E_{ab}$ 3 years |
|-------------------------|------|---------------------|----------------------|------------------------|-------------------------|--------------------------|------------------------|-------------------------|-------------------------|
| NX3 Light-cure<br>White | 1    | 0.57                | 0.24                 | 0.89                   | 1.14                    | 1.61                     | 2.85                   | 2.77                    | 3.25                    |
|                         | 2    | 1.00                | 1.18                 | 2.03                   | 3.64                    | 3.44                     | 1.39                   | 2.62                    | 2.04                    |
|                         | 3    | 0.42                | 0.81                 | 1.89                   | 3.81                    | 3.45                     | 4.18                   | 4.79                    | 4.03                    |
|                         | 4    | 1.16                | 1.07                 | 2.75                   | 3.80                    | 3.73                     | 3.26                   | 4.19                    | 4.43                    |
|                         | 5    | 0.99                | 1.00                 | 1.41                   | 3.03                    | 2.25                     | 1.70                   | 3.77                    | 2.83                    |
|                         | 6    | 0.62                | 1.04                 | 2.53                   | 3.72                    | 3.65                     | 2.94                   | 4.50                    | 5.68                    |
|                         | 7    | 0.92                | 0.99                 | 1.94                   | 2.71                    | 4.11                     | 3.94                   | 5.67                    | 5.11                    |
|                         | 8    | 0.72                | 1.02                 | 2.11                   | 2.50                    | 2.78                     | 2.39                   | 3.91                    | 5.36                    |
|                         | Mean | 0.80                | 0.92                 | 1.95                   | 3.04                    | 3.13                     | 2.83                   | 4.03                    | 4.09                    |
|                         | SD   | 0.24                | 0.27                 | 0.55                   | 0.87                    | 0.79                     | 0.92                   | 0.95                    | 1.21                    |
| NX3 Light-cure<br>Clear | 1    | 0.22                | 1.17                 | 1.70                   | 2.50                    | 3.29                     | 3.53                   | 3.28                    | 2.56                    |
|                         | 2    | 0.78                | 0.88                 | 1.64                   | 1.81                    | 2.57                     | 2.22                   | 2.07                    | 3.09                    |
|                         | 3    | 0.30                | 1.62                 | 2.30                   | 2.89                    | 4.12                     | 3.73                   | 4.65                    | 4.01                    |
|                         | 4    | 0.61                | 1.40                 | 1.85                   | 3.03                    | 4.79                     | 4.43                   | 5.43                    | 5.41                    |
|                         | 5    | 0.45                | 1.12                 | 1.56                   | 3.71                    | 5.59                     | 3.37                   | 2.86                    | 2.39                    |
|                         | 6    | 0.36                | 1.20                 | 2.30                   | 3.19                    | 5.04                     | 3.04                   | 3.57                    | 2.58                    |
|                         | 7    | 0.65                | 1.82                 | 3.04                   | 6.18                    | 6.20                     | 4.97                   | 3.94                    | 3.92                    |
|                         | 8    | 0.30                | 1.14                 | 1.98                   | 4.16                    | 5.30                     | 3.68                   | 3.46                    | 6.26                    |
|                         | Mean | 0.46                | 1.30                 | 2.05                   | 3.43                    | 4.61                     | 3.62                   | 3.66                    | 3.78                    |
|                         | SD   | 0.19                | 0.28                 | 0.46                   | 1.23                    | 1.14                     | 0.78                   | 0.97                    | 1.33                    |

NX3 Light-  
cure  
Yellow

|      |      |      |      |      |      |      |      |      |
|------|------|------|------|------|------|------|------|------|
| 1    | 0.37 | 0.70 | 1.36 | 2.07 | 2.85 | 3.09 | 4.35 | 3.43 |
| 2    | 0.22 | 0.64 | 1.75 | 1.86 | 2.58 | 2.91 | 3.38 | 3.85 |
| 3    | 0.20 | 0.30 | 1.95 | 2.34 | 2.66 | 3.14 | 4.20 | 3.59 |
| 4    | 0.81 | 1.82 | 2.22 | 1.81 | 2.07 | 2.48 | 4.80 | 4.25 |
| 5    | 0.71 | 0.22 | 1.35 | 2.33 | 2.28 | 2.80 | 4.24 | 3.73 |
| 6    | 0.14 | 0.32 | 1.75 | 2.04 | 1.96 | 2.28 | 4.48 | 2.60 |
| 7    | 0.96 | 1.14 | 2.53 | 2.30 | 2.98 | 3.13 | 4.62 | 5.61 |
| 8    | 0.58 | 1.64 | 3.41 | 2.67 | 2.77 | 2.30 | 3.83 | 2.78 |
| Mean | 0.50 | 0.85 | 2.04 | 2.18 | 2.52 | 2.77 | 4.24 | 3.73 |
| SD   | 0.29 | 0.58 | 0.64 | 0.27 | 0.35 | 0.34 | 0.45 | 0.93 |

AllCem Veneer (ACV)  
E-Bleach M

|      |      |      |      |      |      |      |      |      |
|------|------|------|------|------|------|------|------|------|
| 1    | 0.40 | 1.14 | 1.71 | 1.63 | 4.67 | 3.85 | 2.89 | 2.75 |
| 2    | 0.24 | 0.65 | 0.32 | 1.37 | 3.96 | 3.87 | 1.94 | 3.82 |
| 3    | 0.33 | 1.05 | 0.92 | 1.66 | 3.92 | 4.50 | 2.28 | 2.35 |
| 4    | 0.54 | 0.10 | 0.14 | 1.90 | 3.15 | 3.02 | 1.67 | 4.33 |
| 5    | 1.62 | 1.51 | 2.13 | 2.37 | 3.99 | 3.29 | 3.93 | 3.58 |
| 6    | 1.05 | 1.61 | 2.12 | 1.92 | 4.82 | 3.92 | 3.09 | 4.93 |
| 7    | 0.24 | 0.91 | 0.77 | 1.92 | 3.37 | 4.37 | 2.18 | 3.30 |
| 8    | 1.12 | 1.17 | 1.61 | 2.22 | 3.80 | 3.26 | 4.59 | 5.06 |
| Mean | 0.69 | 1.02 | 1.21 | 1.88 | 3.96 | 3.76 | 2.82 | 3.76 |
| SD   | 0.48 | 0.45 | 0.73 | 0.30 | 0.53 | 0.50 | 0.95 | 0.91 |

AllCem Veneer (ACV)

Trans

|      |      |      |      |      |      |      |      |      |
|------|------|------|------|------|------|------|------|------|
| 1    | 0.37 | 2.26 | 1.02 | 1.58 | 3.45 | 4.58 | 4.64 | 4.12 |
| 2    | 0.45 | 1.49 | 0.92 | 0.94 | 2.02 | 2.06 | 2.66 | 1.62 |
| 3    | 1.01 | 1.33 | 2.21 | 0.70 | 3.17 | 2.26 | 3.25 | 2.64 |
| 4    | 0.46 | 1.16 | 1.32 | 2.58 | 2.60 | 3.69 | 2.51 | 1.94 |
| 5    | 0.42 | 1.28 | 1.61 | 1.40 | 3.29 | 4.85 | 3.59 | 2.85 |
| 6    | 1.00 | 0.90 | 1.09 | 1.17 | 3.03 | 2.76 | 2.55 | 1.86 |
| 7    | 0.33 | 1.81 | 3.62 | 4.66 | 4.41 | 6.27 | 4.14 | 4.80 |
| 8    | 0.51 | 1.36 | 1.71 | 4.13 | 4.62 | 4.88 | 3.66 | 2.98 |
| Mean | 0.57 | 1.45 | 1.69 | 2.15 | 3.33 | 3.92 | 3.38 | 2.85 |
| SD   | 0.26 | 0.39 | 0.83 | 1.41 | 0.81 | 1.39 | 0.73 | 1.05 |

AllCem Veneer (ACV)

A1

|      |      |      |      |      |      |      |      |      |
|------|------|------|------|------|------|------|------|------|
| 1    | 0.54 | 0.83 | 0.71 | 1.64 | 2.59 | 2.18 | 3.02 | 3.61 |
| 2    | 0.52 | 3.24 | 2.12 | 2.30 | 2.75 | 3.31 | 2.95 | 4.02 |
| 3    | 0.36 | 0.92 | 1.08 | 0.95 | 2.61 | 2.40 | 3.00 | 2.17 |
| 4    | 0.71 | 1.52 | 1.50 | 2.94 | 3.56 | 3.51 | 4.26 | 3.62 |
| 5    | 0.40 | 0.89 | 1.45 | 1.24 | 3.60 | 2.78 | 2.74 | 2.11 |
| 7    | 1.76 | 1.76 | 2.93 | 4.18 | 5.59 | 3.42 | 2.39 | 2.99 |
| 8    | 0.24 | 1.04 | 1.91 | 1.95 | 3.72 | 3.20 | 2.98 | 2.57 |
| Mean | 0.65 | 1.46 | 1.67 | 2.17 | 3.49 | 2.97 | 3.05 | 3.01 |
| SD   | 0.47 | 0.80 | 0.67 | 1.02 | 0.97 | 0.49 | 0.54 | 0.70 |

NX3 Dual-  
cure  
White

|      |      |      |      |      |      |      |      |      |
|------|------|------|------|------|------|------|------|------|
| 1    | 0.59 | 1.36 | 1.30 | 2.02 | 2.39 | 3.49 | 4.75 | 3.11 |
| 2    | 0.30 | 0.83 | 1.32 | 2.38 | 3.07 | 3.92 | 3.50 | 3.14 |
| 3    | 0.42 | 0.93 | 1.36 | 2.32 | 2.76 | 3.80 | 4.11 | 3.83 |
| 4    | 0.46 | 1.35 | 1.30 | 2.77 | 2.20 | 3.10 | 4.98 | 4.30 |
| 5    | 0.70 | 2.67 | 1.86 | 2.09 | 2.24 | 2.59 | 3.48 | 4.35 |
| 6    | 0.45 | 1.56 | 1.77 | 5.14 | 2.75 | 3.78 | 5.03 | 3.18 |
| 7    | 0.71 | 1.98 | 1.62 | 4.00 | 2.83 | 3.47 | 4.90 | 3.03 |
| 8    | 0.51 | 1.09 | 3.88 | 5.91 | 2.44 | 3.34 | 5.22 | 3.14 |
| Mean | 0.52 | 1.47 | 1.80 | 3.33 | 2.58 | 3.44 | 4.50 | 3.51 |
| SD   | 0.13 | 0.57 | 0.81 | 1.41 | 0.29 | 0.41 | 0.66 | 0.53 |

NX3 Dual-  
cure  
Clear (claro)

|      |      |      |      |      |      |      |      |      |
|------|------|------|------|------|------|------|------|------|
| 1    | 0.41 | 0.63 | 1.62 | 1.73 | 2.04 | 1.99 | 2.42 | 3.06 |
| 2    | 0.33 | 1.55 | 0.81 | 2.40 | 1.75 | 1.98 | 4.02 | 4.37 |
| 3    | 0.30 | 1.56 | 1.42 | 3.26 | 2.67 | 3.45 | 3.22 | 2.70 |
| 4    | 0.24 | 1.22 | 1.14 | 3.02 | 2.34 | 2.29 | 2.62 | 2.63 |
| 5    | 0.17 | 1.44 | 2.03 | 2.81 | 4.64 | 3.79 | 4.40 | 2.99 |
| 6    | 0.14 | 1.51 | 1.40 | 3.53 | 2.27 | 2.06 | 4.37 | 4.62 |
| 7    | 0.46 | 1.06 | 2.01 | 2.49 | 1.90 | 1.32 | 4.02 | 3.05 |
| 8    | 0.47 | 1.66 | 2.19 | 3.01 | 2.56 | 2.33 | 4.13 | 2.58 |
| Mean | 0.32 | 1.33 | 1.58 | 2.78 | 2.52 | 2.40 | 3.65 | 3.25 |
| SD   | 0.12 | 0.32 | 0.45 | 0.53 | 0.85 | 0.76 | 0.74 | 0.74 |

NX3 Dual-  
cure  
Yellow

|      |      |      |      |      |      |      |      |      |
|------|------|------|------|------|------|------|------|------|
| 1    | 0.14 | 1.71 | 0.90 | 2.56 | 1.53 | 1.58 | 4.43 | 2.81 |
| 2    | 0.20 | 1.69 | 0.95 | 2.49 | 2.19 | 1.85 | 4.74 | 2.93 |
| 3    | 0.65 | 2.57 | 0.81 | 1.73 | 1.78 | 1.80 | 2.16 | 2.58 |
| 4    | 0.44 | 1.55 | 2.16 | 2.21 | 1.28 | 1.53 | 4.88 | 3.99 |
| 5    | 0.10 | 1.55 | 1.42 | 2.44 | 1.56 | 2.25 | 4.46 | 5.14 |
| 6    | 0.81 | 2.37 | 1.53 | 2.56 | 2.24 | 2.91 | 3.37 | 5.17 |
| 7    | 0.28 | 2.15 | 1.62 | 2.35 | 2.60 | 1.61 | 2.74 | 4.88 |
| 8    | 0.37 | 1.51 | 0.67 | 2.28 | 3.48 | 2.59 | 4.37 | 4.52 |
| Mean | 0.37 | 1.89 | 1.26 | 2.33 | 2.08 | 2.01 | 3.89 | 4.00 |
| SD   | 0.23 | 0.39 | 0.48 | 0.25 | 0.67 | 0.48 | 0.95 | 1.02 |

AllCem (AC)  
Trans

|      |      |      |      |      |      |      |      |      |
|------|------|------|------|------|------|------|------|------|
| 1    | 0.41 | 1.90 | 1.75 | 2.08 | 2.26 | 4.73 | 3.07 | 2.81 |
| 2    | 0.37 | 1.77 | 2.57 | 2.32 | 2.31 | 5.66 | 3.22 | 2.97 |
| 3    | 0.87 | 1.97 | 2.44 | 3.87 | 3.61 | 5.80 | 4.45 | 3.66 |
| 4    | 0.64 | 2.04 | 2.41 | 6.22 | 4.50 | 6.12 | 5.02 | 4.76 |
| 5    | 0.47 | 2.11 | 2.31 | 5.11 | 4.96 | 5.87 | 5.61 | 6.54 |
| 6    | 0.51 | 2.53 | 2.51 | 5.66 | 3.64 | 5.16 | 5.03 | 4.89 |
| 7    | 0.33 | 2.80 | 2.79 | 5.89 | 4.07 | 6.07 | 5.74 | 5.32 |
| 8    | 0.86 | 3.69 | 3.12 | 6.71 | 5.06 | 5.36 | 6.73 | 5.16 |
| Mean | 0.56 | 2.35 | 2.49 | 4.73 | 3.80 | 5.60 | 4.86 | 4.51 |
| SD   | 0.20 | 0.60 | 0.37 | 1.66 | 1.01 | 0.45 | 1.17 | 1.19 |

## AllCem (AC)

## A1

|      |      |      |      |      |      |      |      |       |
|------|------|------|------|------|------|------|------|-------|
| 1    | 0.51 | 3.38 | 2.89 | 4.14 | 5.32 | 4.54 | 4.37 | 5.14  |
| 2    | 0.33 | 3.30 | 2.70 | 4.51 | 5.50 | 7.27 | 7.98 | 7.61  |
| 3    | 0.54 | 4.53 | 4.00 | 5.33 | 6.43 | 9.09 | 8.71 | 9.91  |
| 4    | 0.35 | 3.01 | 2.62 | 4.22 | 7.76 | 8.63 | 9.50 | 9.76  |
| 5    | 0.37 | 3.61 | 3.90 | 5.02 | 5.41 | 6.45 | 6.79 | 7.11  |
| 6    | 0.20 | 3.12 | 3.35 | 4.52 | 5.41 | 6.94 | 8.31 | 9.02  |
| 7    | 0.37 | 3.05 | 3.02 | 4.01 | 5.60 | 7.25 | 7.48 | 7.80  |
| 8    | 0.22 | 3.03 | 3.78 | 4.71 | 6.42 | 8.12 | 8.50 | 10.97 |
| Mean | 0.36 | 3.38 | 3.28 | 4.56 | 5.98 | 7.29 | 7.70 | 8.42  |
| SD   | 0.11 | 0.48 | 0.52 | 0.42 | 0.79 | 1.33 | 1.47 | 1.75  |

## AllCem (AC)

## A3

|      |      |      |      |      |      |      |      |      |
|------|------|------|------|------|------|------|------|------|
| 1    | 0.58 | 2.24 | 1.80 | 2.69 | 7.44 | 8.49 | 7.34 | 7.28 |
| 2    | 0.61 | 3.00 | 2.85 | 4.44 | 3.62 | 5.03 | 4.66 | 3.86 |
| 3    | 1.10 | 2.95 | 2.06 | 4.24 | 5.22 | 5.52 | 5.96 | 6.23 |
| 4    | 0.71 | 2.58 | 2.20 | 3.66 | 5.84 | 5.94 | 6.23 | 6.40 |
| 5    | 0.30 | 2.03 | 1.70 | 3.23 | 4.32 | 5.14 | 4.22 | 4.47 |
| 6    | 1.08 | 2.26 | 1.56 | 2.89 | 6.03 | 6.20 | 7.13 | 7.42 |
| 7    | 1.12 | 1.27 | 2.01 | 3.30 | 6.72 | 6.62 | 4.38 | 5.21 |
| 8    | 0.41 | 2.55 | 2.17 | 3.72 | 2.55 | 3.69 | 4.31 | 4.71 |
| Mean | 0.74 | 2.36 | 2.04 | 3.52 | 5.22 | 5.83 | 5.53 | 5.70 |
| SD   | 0.30 | 0.52 | 0.37 | 0.58 | 1.53 | 1.30 | 1.21 | 1.24 |
