# Supplementary material for: Color stability of ceramic veneers as a function of resin cement curing mode and shade: 3-year follow-up
Source: PubMed Central journal article supplement (PMC6602287; doi:10.1371/journal.pone.0219183), 2019-07-01
Supplement: pone.0219183.s002.pdf [file pone.0219183.s002.pdf]

| Effect                         | Repeated Measures Analysis of Variance<br>Sigma-restricted parameterization<br>Effective hypothesis decomposition |                  |          |          |          |
|--------------------------------|-------------------------------------------------------------------------------------------------------------------|------------------|----------|----------|----------|
|                                | SS                                                                                                                | Degr. of Freedom | MS       | F        | p        |
| Intercept                      | 2145,337                                                                                                          | 1                | 2145,337 | 978,5221 | 0,000000 |
| Light-cured resin cements      | 13,487                                                                                                            | 5                | 2,697    | 1,2303   | 0,312972 |
| Error                          | 87,697                                                                                                            | 40               | 2,192    |          |          |
| TIME                           | 420,143                                                                                                           | 6                | 70,024   | 148,8901 | 0,000000 |
| TIME*Light-cured resin cements | 56,222                                                                                                            | 30               | 1,874    | 3,9848   | 0,000000 |
| Error                          | 112,873                                                                                                           | 240              | 0,470    |          |          |

| Tukey HSD test; variable DV_1<br>Homogenous Groups, alpha = ,05000<br>Error: Between MS = 2,1924, df = 40,000 |                           |            |              |      |
|---------------------------------------------------------------------------------------------------------------|---------------------------|------------|--------------|------|
| Cell No.                                                                                                      | Light-cured resin cements |            | DV_1<br>Mean | 1    |
| 3                                                                                                             |                           | NX3-Yellow | 2,373061     | **** |
| 6                                                                                                             |                           | AC-A1      | 2,399592     | **** |
| 4                                                                                                             |                           | AC-Trans   | 2,518750     | **** |
| 5                                                                                                             |                           | AC-Bleach  | 2,555714     | **** |
| 1                                                                                                             |                           | NX3-White  | 2,691429     | **** |
| 2                                                                                                             |                           | NX3-Clear  | 2,979286     | **** |

| Tukey HSD test; variable DV_1<br>Homogenous Groups, alpha = ,05000<br>Error: Within MS = ,47031, df = 240,00 |        |              |      |      |      |      |
|--------------------------------------------------------------------------------------------------------------|--------|--------------|------|------|------|------|
| Cell No.                                                                                                     | TIME   | DV_1<br>Mean | 1    | 2    | 3    | 4    |
| 1                                                                                                            | DE1h   | 0,610870     |      | **** |      |      |
| 2                                                                                                            | DE24h  | 1,147174     |      |      | **** |      |
| 3                                                                                                            | DE30d  | 2,476522     |      |      |      | **** |
| 5                                                                                                            | DE1y   | 3,340870     | **** |      |      |      |
| 4                                                                                                            | DE180d | 3,521522     | **** |      |      |      |
| 6                                                                                                            | DE2y   | 3,522826     | **** |      |      |      |
| 7                                                                                                            | DE3y   | 3,545217     | **** |      |      |      |

| Tukey HSD test; variable DV_1<br>Homogenous Groups, alpha = ,05000<br>Error: Within MS = ,47031, df = 240,00 |        |              |      |      |      |      |
|--------------------------------------------------------------------------------------------------------------|--------|--------------|------|------|------|------|
| Cell No.                                                                                                     | TIME   | DV_1<br>Mean | 1    | 2    | 3    | 4    |
| 1                                                                                                            | DE1h   | 0,610870     |      | **** |      |      |
| 2                                                                                                            | DE24h  | 1,147174     |      |      | **** |      |
| 3                                                                                                            | DE30d  | 2,476522     |      |      |      | **** |
| 5                                                                                                            | DE1y   | 3,340870     | **** |      |      |      |
| 4                                                                                                            | DE180d | 3,521522     | **** |      |      |      |
| 6                                                                                                            | DE2y   | 3,522826     | **** |      |      |      |
| 7                                                                                                            | DE3y   | 3,545217     | **** |      |      |      |



| Tukey HSD test; variable DV_1<br>Homogenous Groups, alpha = ,05000 (Non-Exhaustive Search)<br>Error: Between; Within; Pooled MS = ,71632, df = 163,96 |      |      |      |      |      |
|-------------------------------------------------------------------------------------------------------------------------------------------------------|------|------|------|------|------|
| Cell No.                                                                                                                                              | 13   | 14   | 15   | 16   | 17   |
| 8                                                                                                                                                     |      |      |      |      |      |
| 15                                                                                                                                                    |      |      |      |      |      |
| 22                                                                                                                                                    |      |      |      |      |      |
| 36                                                                                                                                                    |      |      |      |      |      |
| 29                                                                                                                                                    |      |      |      |      |      |
| 16                                                                                                                                                    |      |      |      |      |      |
| 1                                                                                                                                                     |      |      |      |      |      |
| 2                                                                                                                                                     |      |      |      |      |      |
| 30                                                                                                                                                    |      |      |      |      |      |
| 9                                                                                                                                                     |      |      |      |      |      |
| 23                                                                                                                                                    |      |      |      |      |      |
| 37                                                                                                                                                    |      |      |      |      |      |
| 31                                                                                                                                                    |      |      |      |      |      |
| 17                                                                                                                                                    | **** |      |      |      |      |
| 24                                                                                                                                                    | **** | **** |      |      |      |
| 38                                                                                                                                                    | **** | **** |      |      |      |
| 18                                                                                                                                                    | **** | **** | **** |      |      |
| 34                                                                                                                                                    | **** | **** | **** | **** |      |
| 5                                                                                                                                                     | **** | **** | **** | **** |      |
| 19                                                                                                                                                    | **** | **** | **** | **** |      |
| 28                                                                                                                                                    | **** | **** | **** | **** |      |
| 40                                                                                                                                                    | **** | **** | **** | **** | **** |
| 42                                                                                                                                                    | **** | **** | **** | **** | **** |
| 3                                                                                                                                                     | **** | **** | **** | **** | **** |
| 41                                                                                                                                                    | **** | **** | **** | **** | **** |
| 4                                                                                                                                                     | **** | **** | **** | **** | **** |
| 25                                                                                                                                                    | **** | **** | **** | **** | **** |
| 27                                                                                                                                                    | **** | **** | **** | **** | **** |
| 10                                                                                                                                                    | **** | **** | **** | **** | **** |
| 39                                                                                                                                                    | **** | **** | **** | **** | **** |
| 12                                                                                                                                                    | **** | **** | **** | **** | **** |
| 13                                                                                                                                                    | **** | **** | **** | **** | **** |
| 21                                                                                                                                                    |      | **** | **** | **** | **** |
| 33                                                                                                                                                    | **** | **** | **** | **** | **** |
| 35                                                                                                                                                    | **** | **** | **** | **** | **** |
| 14                                                                                                                                                    | **** | **** | **** | **** | **** |
| 26                                                                                                                                                    |      |      | **** | **** | **** |
| 32                                                                                                                                                    |      |      | **** | **** | **** |
| 6                                                                                                                                                     |      |      | **** | **** | **** |
| 7                                                                                                                                                     |      |      | **** | **** | **** |
| 20                                                                                                                                                    |      |      |      | **** | **** |
| 11                                                                                                                                                    |      |      |      |      | **** |
