# Supplementary material for: Color stability of ceramic veneers as a function of resin cement curing mode and shade: 3-year follow-up
Source: PubMed Central journal article supplement (PMC6602287; doi:10.1371/journal.pone.0219183), 2019-07-01
Supplement: pone.0219183.s003.pdf [file pone.0219183.s003.pdf]

| Effect                        | Repeated Measures Analysis of Variance<br>Sigma-restricted parameterization<br>Effective hypothesis decomposition |                  |          |          |          |
|-------------------------------|-------------------------------------------------------------------------------------------------------------------|------------------|----------|----------|----------|
|                               | SS                                                                                                                | Degr. of Freedom | MS       | F        | p        |
| Intercept                     | 4013,812                                                                                                          | 1                | 4013,812 | 1621,445 | 0,000000 |
| Dual-cured resin cements      | 404,107                                                                                                           | 5                | 80,821   | 32,649   | 0,000000 |
| Error                         | 103,969                                                                                                           | 42               | 2,475    |          |          |
| TIME                          | 776,341                                                                                                           | 6                | 129,390  | 215,491  | 0,000000 |
| TIME*Dual-cured resin cements | 173,187                                                                                                           | 30               | 5,773    | 9,614    | 0,000000 |
| Error                         | 151,312                                                                                                           | 252              | 0,600    |          |          |

| Tukey HSD test; variable DV_1           |                          |           |      |      |      |
|-----------------------------------------|--------------------------|-----------|------|------|------|
| Homogenous Groups, alpha = ,05000       |                          |           |      |      |      |
| Error: Between MS = 2,4755, df = 42,000 |                          |           |      |      |      |
| Cell No.                                | Dual-cured resin cements | DV_1 Mean | 1    | 2    | 3    |
| 2                                       | NX3-Clear                | 2,321071  | **** |      |      |
| 3                                       | NX3-Yellow               | 2,368929  | **** |      |      |
| 1                                       | NX3-White                | 2,763571  | **** |      |      |
| 4                                       | AC-Trans                 | 3,773036  |      | **** |      |
| 6                                       | AC-A3                    | 4,127500  |      | **** |      |
| 5                                       | AC-A1                    | 5,383571  |      |      | **** |

| Tukey HSD test; variable DV_1          |        |              |      |      |      |      |      |
|----------------------------------------|--------|--------------|------|------|------|------|------|
| Homogenous Groups, alpha = ,05000      |        |              |      |      |      |      |      |
| Error: Within MS = ,60044, df = 252,00 |        |              |      |      |      |      |      |
| Cell No.                               | TIME   | DV_1<br>Mean | 1    | 2    | 3    | 4    | 5    |
| 1                                      | DE1h   | 0,477292     |      |      | **** |      |      |
| 2                                      | DE24h  | 2,129583     |      |      |      | **** |      |
| 3                                      | DE30d  | 3,541458     | **** |      |      |      |      |
| 4                                      | DE130d | 3,698125     | **** |      |      |      |      |
| 5                                      | DE1y   | 4,427292     |      |      |      |      | **** |
| 7                                      | DE3y   | 4,898125     |      | **** |      |      |      |
| 6                                      | DE2y   | 5,022083     |      | **** |      |      |      |



| Tukey HSD test; variable DV_1                             |      |      |      |      |      |      |
|-----------------------------------------------------------|------|------|------|------|------|------|
| Homogenous Groups, alpha = ,05000 (Non-Exhaustive Search) |      |      |      |      |      |      |
| Error: Between; Within; Pooled MS = ,86830, df = 187,14   |      |      |      |      |      |      |
| Cell No.                                                  | 13   | 14   | 15   | 16   | 17   | 18   |
| 8                                                         |      |      |      |      |      |      |
| 29                                                        |      |      |      |      |      |      |
| 15                                                        |      |      |      |      |      |      |
| 1                                                         |      |      |      |      |      |      |
| 22                                                        |      |      |      |      |      |      |
| 36                                                        |      |      |      |      |      |      |
| 9                                                         |      |      |      |      |      |      |
| 2                                                         |      |      |      |      |      |      |
| 16                                                        |      |      |      |      |      |      |
| 19                                                        |      |      |      |      |      |      |
| 18                                                        |      |      |      |      |      |      |
| 17                                                        |      |      |      |      |      |      |
| 23                                                        |      |      |      |      |      |      |
| 37                                                        |      |      |      |      |      |      |
| 12                                                        |      |      |      |      |      |      |
| 11                                                        |      |      |      |      |      |      |
| 4                                                         |      |      |      |      |      |      |
| 10                                                        |      |      |      |      |      |      |
| 14                                                        |      |      |      |      |      |      |
| 3                                                         |      |      |      |      |      |      |
| 30                                                        |      |      |      |      |      |      |
| 5                                                         | **** |      |      |      |      |      |
| 7                                                         | **** |      |      |      |      |      |
| 38                                                        |      |      |      |      |      |      |
| 13                                                        | **** |      |      |      |      |      |
| 25                                                        | **** | **** |      |      |      |      |
| 20                                                        | **** | **** | **** |      |      |      |
| 21                                                        | **** | **** | **** |      |      |      |
| 6                                                         | **** | **** | **** | **** |      |      |
| 28                                                        | **** | **** | **** | **** |      |      |
| 31                                                        | **** | **** | **** | **** |      |      |
| 24                                                        | **** | **** | **** | **** |      |      |
| 27                                                        | **** | **** | **** | **** |      |      |
| 39                                                        | **** | **** | **** | **** |      |      |
| 41                                                        |      | **** | **** | **** | **** |      |
| 26                                                        |      |      | **** | **** | **** |      |
| 42                                                        |      |      | **** | **** | **** |      |
| 40                                                        |      |      |      | **** | **** |      |
| 32                                                        |      |      |      | **** | **** |      |
| 33                                                        |      |      |      |      | **** | **** |
| 34                                                        |      |      |      |      |      | **** |
| 35                                                        |      |      |      |      |      | **** |
